# Supplementary material for: Debiasing and Educational Interventions in Medical Diagnosis: A Systematic Review
Source: medRxiv preprint, doi:10.1101/2022.09.12.22279750, version 1 (2022-09-14)
Supplement: Supplementary Materials [file 279750_file02.docx]

**Supplementary Materials**


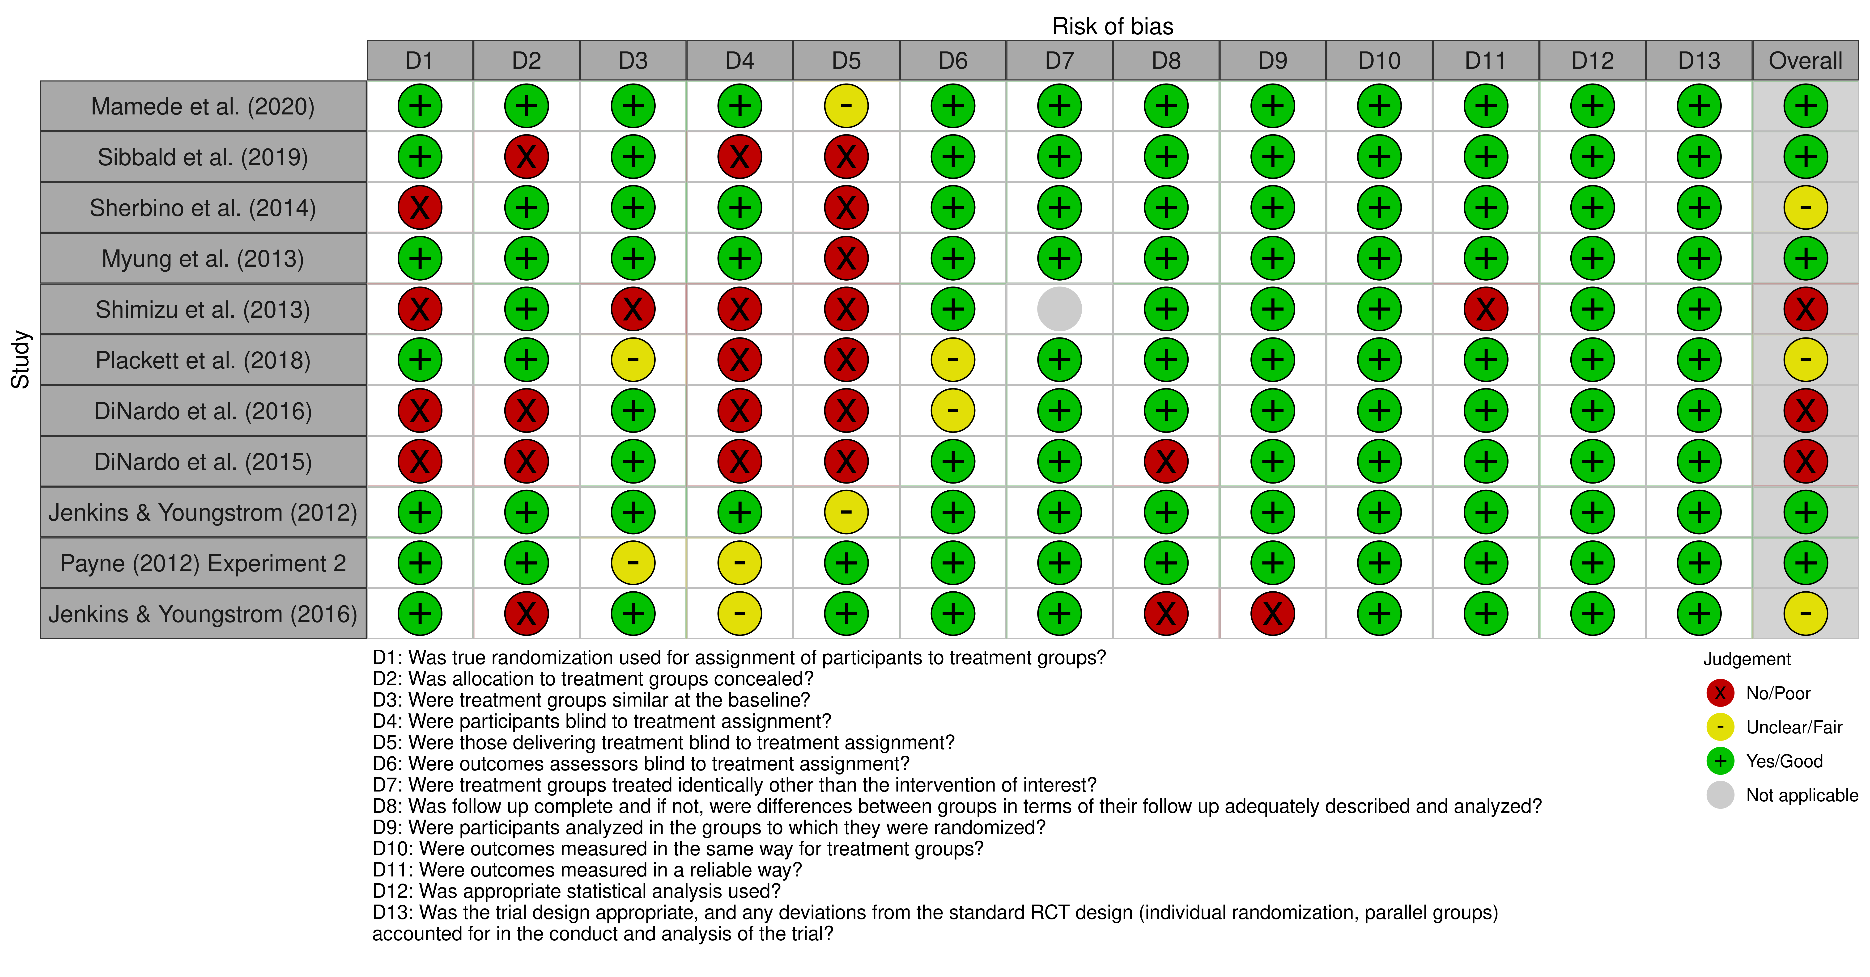
Figure S1. Randomized control trials risk of bias assessments


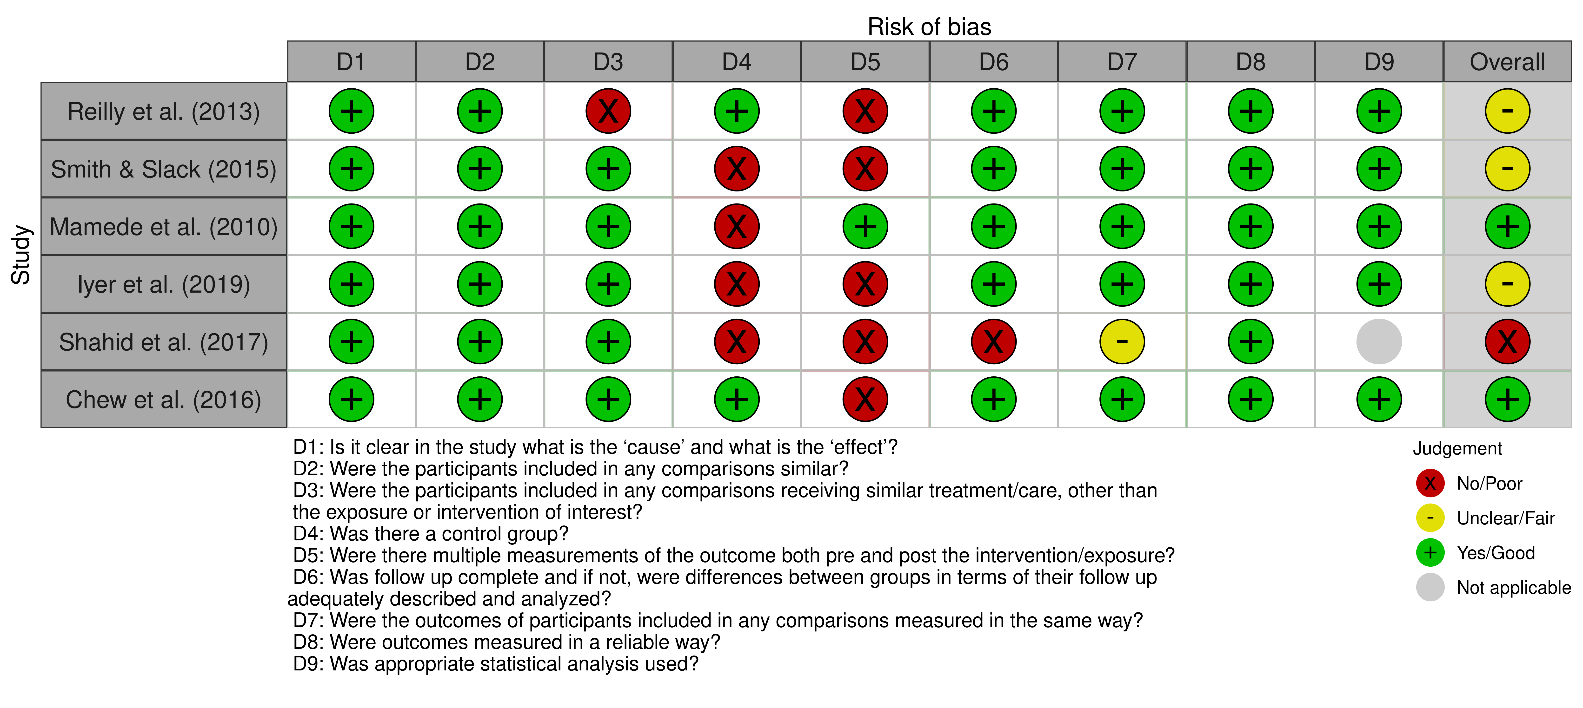
Figure S2. Quasi-experimental studies risk of bias assessments

Search Strategy

Ovid MEDLINE: Epub Ahead of Print, In-Process & Other Non-Indexed Citations, Ovid MEDLINE® Daily and Ovid MEDLINE® <1946-Present>

1 Cognitive bias.mp. 1744

2 premature closure.mp. 814

3 exp Heuristics/ or heuristics.mp. 4117

4 exp Bias/ or anchoring bias.mp. 73700

5 overconfidence.mp. 608

6 fallacy.mp. 1797

7 exp Prejudice/ or prejudice.mp. 37695

8 1 or 2 or 3 or 4 or 5 or 6 or 7 119367

9 diagnostic error.mp. or exp Diagnostic Errors/ 122423

10 misdiagnosis.mp. 17068

11 exp Delayed Diagnosis/ or exp Diagnosis/ or diagnosis.mp. or exp Missed Diagnosis/ 10681337

12 9 or 10 or 11 10683801

13 8 and 12 61328

14 debias.mp. 30

15 debiasing strategy.mp. 10

16 medical education.mp. or exp Education, Medical/ 200243

17 educational initiative.mp. 385

18 bias mitigation.mp. 30

19 debiasing.mp. 193

20 14 or 15 or 16 or 17 or 18 or 19 200742

21 13 and 20 959

22 limit 21 to ("review" or "scientific integrity review" or "systematic review") 49

23 21 not 22 910

Embase Classic+Embase <1947 to 2022 April 22>

1 Cognitive bias.mp. 4002

2 premature closure.mp. 1335

3 exp Heuristics/ or heuristics.mp. 5142

4 exp Bias/ or anchoring bias.mp. 37939

5 overconfidence.mp. 716

6 fallacy.mp. 2256

7 exp Prejudice/ or prejudice.mp. 8895

8 1 or 2 or 3 or 4 or 5 or 6 or 7 59454

9 diagnostic error.mp. or exp Diagnostic Errors/ 117433

10 misdiagnosis.mp. 25135

11 exp Delayed Diagnosis/ or exp Diagnosis/ or diagnosis.mp. or exp Missed Diagnosis/ 9923600

12 9 or 10 or 11 9925150

13 8 and 12 22435

14 debias.mp. 25

15 debiasing strategy.mp. 11

16 medical education.mp. or exp Education, Medical/ 381660

17 educational initiative.mp. 692

18 bias mitigation.mp. 27

19 debiasing.mp. 212

20 14 or 15 or 16 or 17 or 18 or 19 382401

21 13 and 20 453

22 limit 21 to ("review" or "scientific integrity review" or "systematic review") 46

23 21 not 22 407

APA PsycInfo <1806 to April Week 3 2022>

1 Cognitive bias.mp. 5317

2 premature closure.mp. 133

3 exp Heuristics/ or heuristics.mp. 7026

4 exp Bias/ or anchoring bias.mp. 66

5 overconfidence.mp. 1316

6 fallacy.mp. 2277

7 exp Prejudice/ or prejudice.mp. 22661

8 1 or 2 or 3 or 4 or 5 or 6 or 7 38054

9 diagnostic error.mp. or exp Diagnostic Errors/ 182

10 misdiagnosis.mp. 2304

11 exp Delayed Diagnosis/ or exp Diagnosis/ or diagnosis.mp. or exp Missed Diagnosis/ 363569

12 9 or 10 or 11 364085

13 8 and 12 1425

14 debias.mp. 52

15 debiasing strategy.mp. 13

16 medical education.mp. or exp Education, Medical/ 21855

17 educational initiative.mp. 121

18 bias mitigation.mp. 18

19 debiasing.mp. 346

20 14 or 15 or 16 or 17 or 18 or 19 22352

21 13 and 20 28

22 limit 21 to ("review" or "scientific integrity review" or "systematic review") 0

23 21 not 22 28

Ovid Healthstar <1966 to March 2022>

1 Cognitive bias.mp. 996

2 premature closure.mp. 426

3 exp Heuristics/ or heuristics.mp. 2407

4 exp Bias/ or anchoring bias.mp. 67213

5 overconfidence.mp. 370

6 fallacy.mp. 1146

7 exp Prejudice/ or prejudice.mp. 33589

8 1 or 2 or 3 or 4 or 5 or 6 or 7 105232

9 diagnostic error.mp. or exp Diagnostic Errors/ 100430

10 misdiagnosis.mp. 9660

11 exp Delayed Diagnosis/ or exp Diagnosis/ or diagnosis.mp. or exp Missed Diagnosis/ 6267940

12 9 or 10 or 11 6268699

13 8 and 12 55978

14 debias.mp. 15

15 debiasing strategy.mp. 6

16 medical education.mp. or exp Education, Medical/ 179162

17 educational initiative.mp. 316

18 bias mitigation.mp. 18

19 debiasing.mp. 111

20 14 or 15 or 16 or 17 or 18 or 19 179506

21 13 and 20 936

22 limit 21 to ("review" or "scientific integrity review" or "systematic review") 49

23 21 not 22 887
